# Supplementary material for: Pyrophosphate-induced reorganization of a reporter–receptor assembly via boronate esterification; a new strategy for the turn-on fluorescent detection of multi-phosphates in aqueous solution
Source: Royal Society of Chemistry journal article supplement (doi:10.1039/b808027e), 2008-01-01
Supplement: b808027e.pdf [file b808027e.pdf]

## Electronic Supplementary Information

### A pyrophosphate-induced reorganization of reporter-receptor assembly via boronate esterification; new strategy of a turn-on fluorescent detection of multi-phosphates in aqueous solution

Aiko Nonaka,<sup>a</sup> Shoichi Horie,<sup>a</sup> Tony D. James<sup>b</sup> and Yuji Kubo<sup>c\*</sup>

<sup>a</sup>Department of Applied Chemistry, Graduate School of Science and Engineering, Saitama University, 255 Shimo-ohkubo, Sakura-ku, Saitama 338-8570, Japan

<sup>b</sup>Department of Chemistry, University of Bath, Bath, BA2 7AY, UK

<sup>c</sup>Departement of Applied Chemistry, Graduate School of Urban Environmental Sciences, Tokyo Metropolitan University, 1-1 Minami-ohsawa, Hachioji, Tokyo 192-0397, Japan

#### 1. PPI-induced fluorescence enhancement

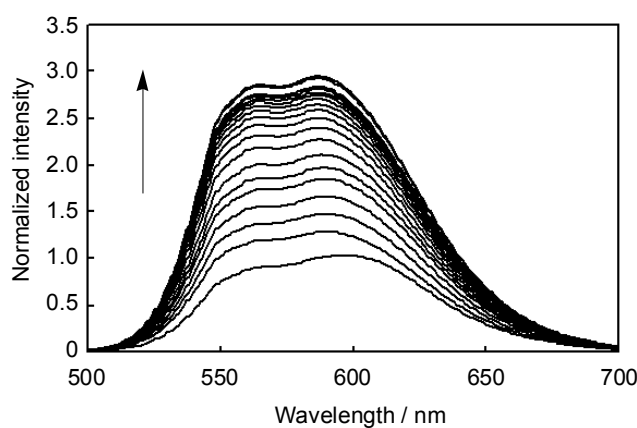

**Fig. S1.** Change in fluorescence spectra ( $\lambda_{\text{ex}} = 480 \text{ nm}$ ) for ARS ( $50 \mu\text{M}$ ) upon addition of PPI ( $0 - 500 \mu\text{M}$ ) in the presence of **1·Zn** ( $250 \mu\text{M}$ ) in MeOH-10 mM HEPES buffer (1:1 v/v) containing 10 mM NaCl at pH 7.4 at 25 °C.

## 2. Fluorescence spectrum of ARS with Zn<sup>II</sup>-DPA-free phenylboronic acid

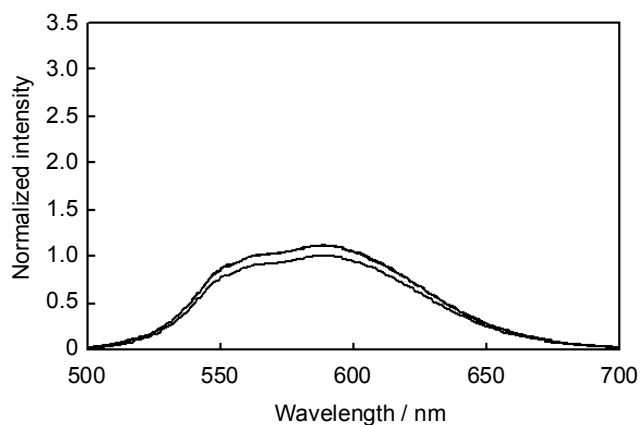

**Fig. S2.** Change in fluorescence spectra ( $\lambda_{\text{ex}} = 480 \text{ nm}$ ) for ARS ( $50 \mu\text{M}$ ) upon addition of PPI (0 – 1000  $\mu\text{M}$ ) in the presence of phenylboronic acid (250  $\mu\text{M}$ ) in MeOH-10 mM HEPES buffer (1:1 v/v) containing 10 mM NaCl at pH 7.4 at 25 °C.

## 3. <sup>1</sup>H, <sup>1</sup>H COSY spectrum of alizarin plus 1·Zn with PPI

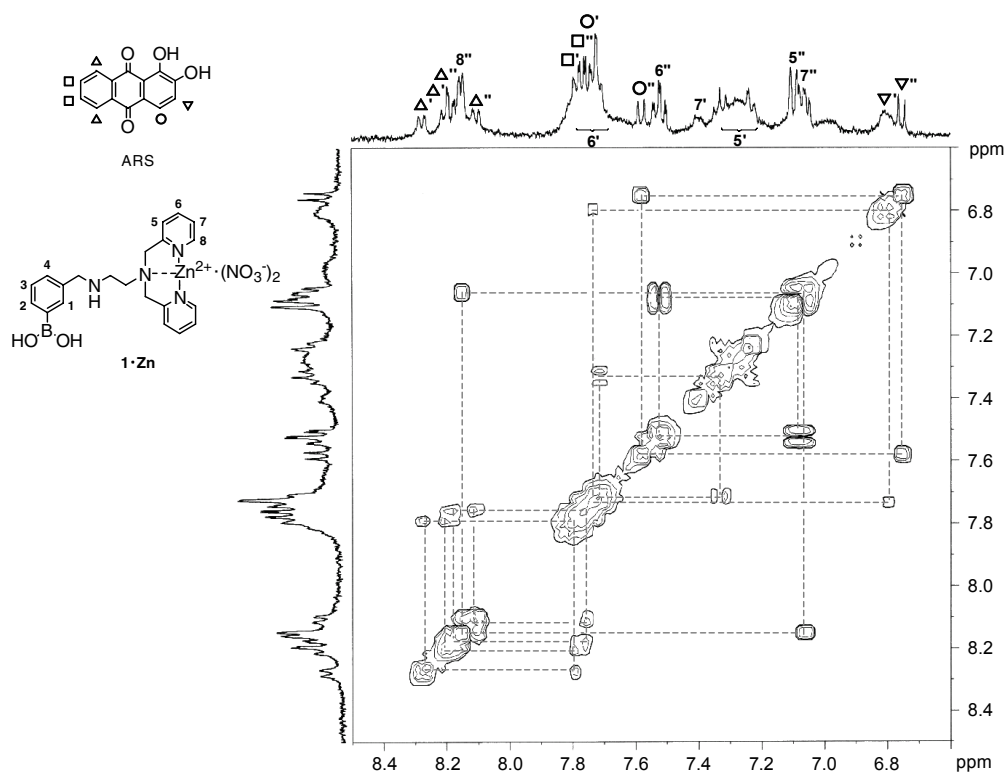

**Fig. S3.** <sup>1</sup>H, <sup>1</sup>H COSY spectrum in CD<sub>3</sub>OD–D<sub>2</sub>O (9:1 v/v) (400 MHz, r.t.). [alizarin] = 2.4 mM, [1·Zn] = 2.4 mM. The spectrum was obtained after (solid (PPI) – liquid (2.4 mM of alizarin and 1·Zn in CD<sub>3</sub>OD–D<sub>2</sub>O (9:1 v/v)) two-phase extraction.

### 3. Fluorescence spectra of ARS upon adding an incremental amount of **3**•Zn

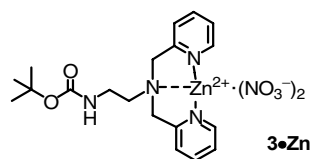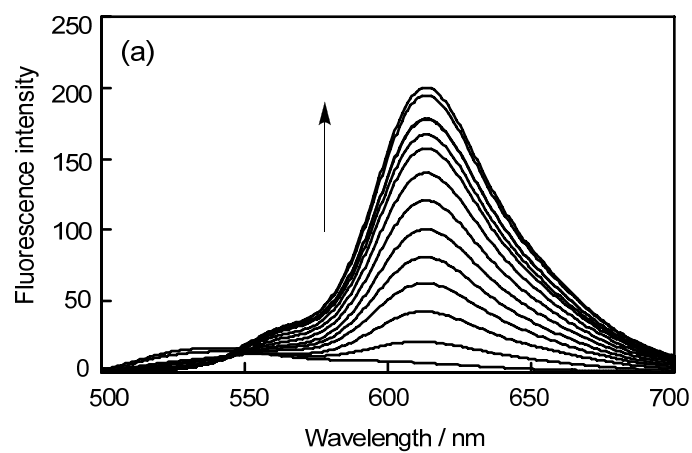

**Fig. S4.** The fluorescence spectra for ARS (50 μM) upon addition of **3**•Zn (0 – 250 μM) in MeOH-10 mM HEPES buffer (1:1 v/v) containing 10 mM NaCl at pH 7.4 at 25 °C,  $\lambda_{\text{ex}} = 480$  nm.
